# Supplementary material
Source: Springer Nature journal article supplement (https://www.springermedizin.de/resource/supplementary/12916_2008_156_MOESM5_ESM.pdf/9599284)
Supplement: MOESM5 [file 9599284]

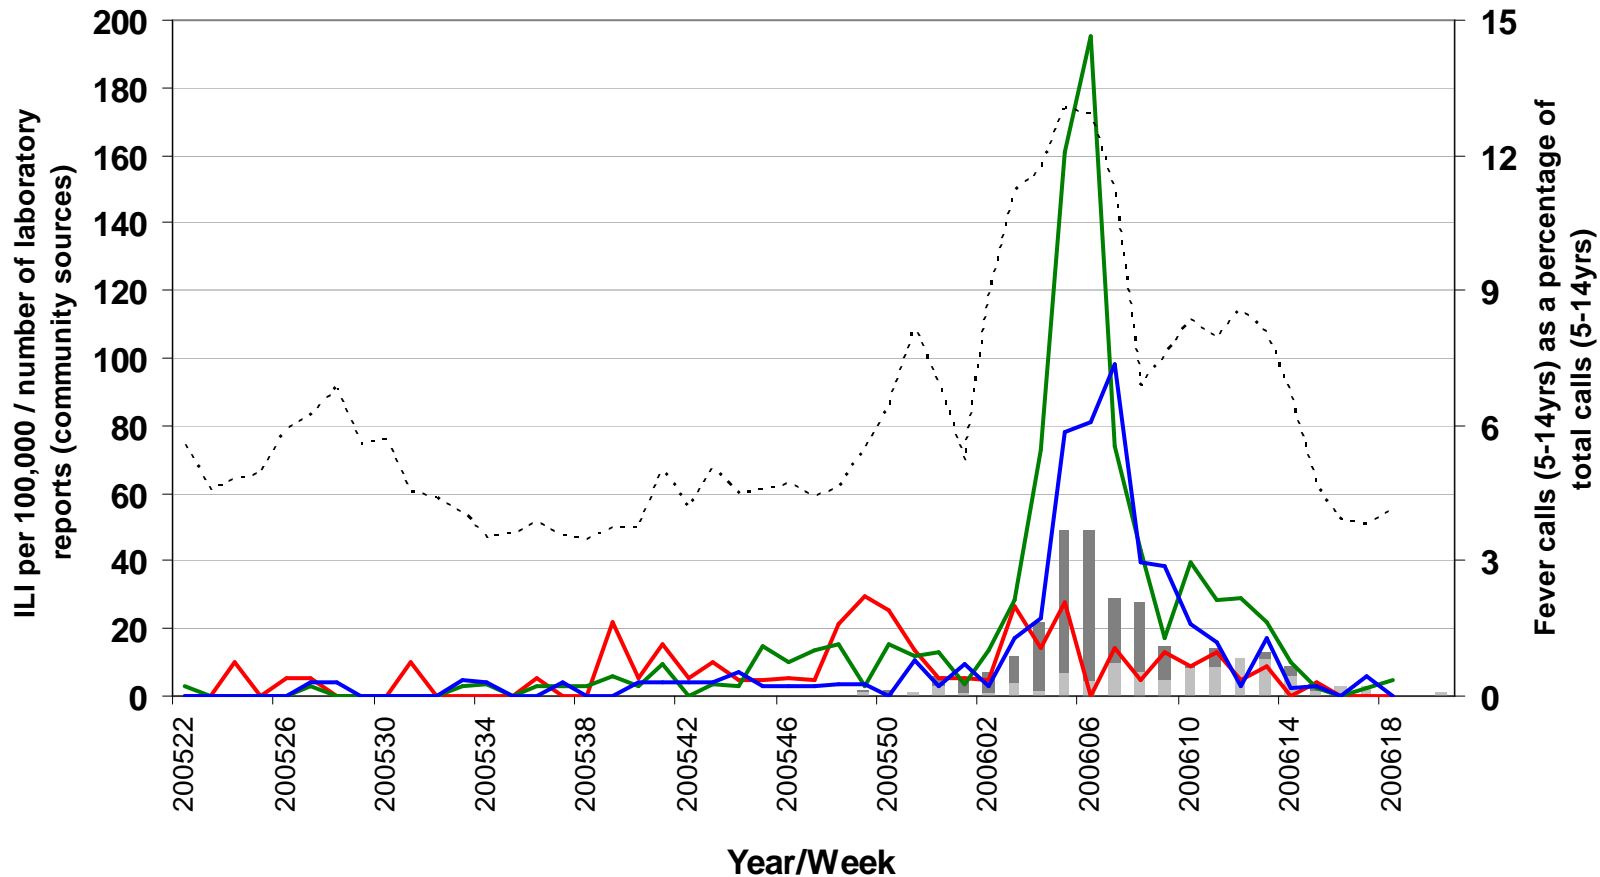

- Laboratory reports of influenza A (England and Wales)
- Laboratory reports of influenza B (England and Wales)
- ILI (5-14yrs) - North England
- ILI (5-14yrs) - Central England and Wales
- ILI (5-14yrs) - South England
- NHS Direct fever calls (5-14yrs) - England and Wales
